# Supplementary material for: High-density lipoproteins during sepsis: from bench to bedside
Source: Springer Nature journal article supplement (doi:10.1186/s13054-020-02860-3), 2020-04-07
Supplement: MOESM1 [file 17875100]

**Table S1: HDL-based therapies in experimental sepsis studies**

| Study                                     | Animal                    | Sepsis                                                                                           | Administration route if LPS | LPS dosing                  | rHDL/peptide            | rHDL/peptide administration route | rHDL/peptide dosing    | Timing                            |
|-------------------------------------------|---------------------------|--------------------------------------------------------------------------------------------------|-----------------------------|-----------------------------|-------------------------|-----------------------------------|------------------------|-----------------------------------|
| <b>Datta. J Clin Exp Cardiol</b> 2011 (1) | Rat                       | LPS<br>( <i>E. coli</i> 026:B6)                                                                  | IP                          | 10mg/kg                     | 4F peptide              | IP                                | 10mg/kg                | LPS + 4F simultaneously           |
| <b>Kwon. J Trauma</b> 2012 (2)            | Rat                       | LPS<br>( <i>E. coli</i> 026:B6)                                                                  | IV                          | 10mg/kg                     | 4F peptide              | IP                                | 10mg/kg                | 10' after LPS injection           |
| <b>Sharifov. Plos One</b> 2013 (3)        | Rat                       | LPS<br>( <i>E. coli</i> 026:B6)                                                                  | IP                          | 30mg/kg                     | 4F peptide              | IV                                | 10mg/kg                | 1h after LPS injection            |
| <b>Dai. J lipid Res</b> 2010 (4)          | Rat                       | LPS<br>( <i>E. coli</i> 0111:B4)                                                                 | IV                          | 10mg/kg                     | 4F peptide              | IP                                | 10mg/kg                | LPS + 4F simultaneously           |
| <b>Levine. PNAS</b> 1993 (5)              | Mice                      | LPS<br>( <i>E. coli</i> 026:B6)                                                                  | IP                          | 10mg/kg                     | - 18A peptide<br>- rHDL | IV                                | - 80mg/kg<br>- 80mg/kg | 15' before sepsis<br>Pretreatment |
| <b>Casas. Am Surg</b> 1996 (6)            | Rabbit                    | <i>E. coli</i>                                                                                   | IV                          | 4.10 <sup>9</sup><br>CFU/kg | rHDL (red cross Bern)   | IV                                | 75mg/kg                | Before sepsis<br>Pretreatment     |
| <b>Casas. J Surg Res</b> 1995 (7)         | Rabbit                    | Blended Gram neg LPS                                                                             | IV                          | Not stated                  | rHDL (red cross Bern)   | IV                                | - 25mg/kg<br>- 75mg/kg | Before sepsis<br>Pretreatment     |
| <b>McDonald. Shock</b> 2003 (8)           | Rat                       | LPS<br>( <i>E. coli</i> 0127:B8)                                                                 | IV                          | 6mg/kg                      | rHDL (red cross Bern)   | IV                                | Not stated             | 5' before LPS<br>Pretreatment     |
| <b>Zhang. Biol Chem</b> 2015 (9)          | Rat                       | LPS                                                                                              | IV                          | Not stated                  | ApoA-I Milano           | IV                                | 40mg/kg                | Before sepsis<br>Pretreatment     |
| <b>Zhang. AJPHCP</b> 2009 (10)            | Rat                       | CLP                                                                                              |                             |                             | 4F peptide              | IP                                | 10mg/kg                | 6h after CLP                      |
| <b>Guo. J Biol Chem</b> 2013 (11)         | ApoA-I<br>KO +<br>tg mice | CLP                                                                                              |                             |                             | none                    | none                              | none                   | none                              |
| <b>Moreira. AJPRICP</b> 2014 (12)         | Rat                       | CLP                                                                                              |                             |                             | 4F peptide              | IP                                | 10mg/kg                | 6h after CLP                      |
| <b>Tanaka. Anesthesiology</b> 2020 (13)   | Mice                      | - CLP<br>- <i>E. coli</i> IAI76<br>intraperitoneal injection<br>- <i>P. aeruginosa</i> pneumonia |                             |                             | rHDL (CSL Behring)      | IV                                | 40mg/kg                | 2h after sepsis                   |

1. Datta G, Gupta H, Zhang Z, Mayakonda P, Anantharamaiah GM, White CR. HDL Mimetic Peptide Administration Improves Left Ventricular Filling and Cardiac output in Lipopolysaccharide-Treated Rats. *J Clin Exp Cardiol*. 22 déc 2011;2(172).
2. Kwon WY, Suh GJ, Kim KS, Kwak YH, Kim K. 4F, apolipoprotein AI mimetic peptide, attenuates acute lung injury and improves survival in endotoxemic rats. *J Trauma Acute Care Surg*. juin 2012;72(6):1576-83.
3. Sharifov OF, Xu X, Gaggar A, Grizzle WE, Mishra VK, Honavar J, et al. Anti-inflammatory mechanisms of apolipoprotein A-I mimetic peptide in acute respiratory distress syndrome secondary to sepsis. *PLoS ONE*. 2013;8(5):e64486.
4. Dai L, Datta G, Zhang Z, Gupta H, Patel R, Honavar J, et al. The apolipoprotein A-I mimetic peptide 4F prevents defects in vascular function in endotoxemic rats. *J Lipid Res*. sept 2010;51(9):2695-705.
5. Levine DM, Parker TS, Donnelly TM, Walsh A, Rubin AL. In vivo protection against endotoxin by plasma high density lipoprotein. *Proc Natl Acad Sci USA*. 15 déc 1993;90(24):12040-4.
6. Casas AT, Hubsch AP, Doran JE. Effects of reconstituted high-density lipoprotein in persistent gram-negative bacteremia. *Am Surg*. mai 1996;62(5):350-5.
7. Casas AT, Hubsch AP, Rogers BC, Doran JE. Reconstituted high-density lipoprotein reduces LPS-stimulated TNF alpha. *J Surg Res*. nov 1995;59(5):544-52.
8. McDonald MC, Dhady P, Cockerill GW, Cuzzocrea S, Mota-Filipe H, Hinds CJ, Miller NE, Thiemermann C: Reconstituted high-density lipoprotein attenuates organ injury and adhesion molecule expression in a rodent model of endotoxic shock. *Shock* 2003, 20(6):551-557.
9. Zhang X, Wang L, Chen B. Recombinant HDL (Milano) protects endotoxin-challenged rats from multiple organ injury and dysfunction. *Biol Chem*. janv 2015;396(1):53-60.
10. Zhang Z, Datta G, Zhang Y, Miller AP, Mochon P, Chen Y-F, et al. Apolipoprotein A-I mimetic peptide treatment inhibits inflammatory responses and improves survival in septic rats. *Am J Physiol Heart Circ Physiol*. août 2009;297(2):H866-873.
11. Guo L, Ai J, Zheng Z, Howatt DA, Daugherty A, Huang B, et al. High density lipoprotein protects against polymicrobe-induced sepsis in mice. *J Biol Chem*. 21 juin 2013;288(25):17947-53.
12. Moreira RS, Irigoyen M, Sanches TR, Volpini RA, Camara NOS, Malheiros DM, et al. Apolipoprotein A-I mimetic peptide 4F attenuates kidney injury, heart injury, and endothelial dysfunction in sepsis. *Am J Physiol Regul Integr Comp Physiol*. 1 sept 2014;307(5):R514-524.
13. Tanaka S, Genève C, Zappella N, Yong-Sang J, Planesse C, Louedec L, et al. Reconstituted High-density Lipoprotein Therapy Improves Survival in Mouse Models of Sepsis. *Anesthesiology*. 2020 Feb 20.
